# Supplementary material for: An intra-population heterothermy continuum: notable repeatability of body temperature variation in food-deprived yellow-necked mice
Source: Oxford University Press journal article supplement (doi:10.1242/jeb.197152), 2019-03-15
Supplement: jeb197152supp.pdf [file jeb197152supp.pdf]

## Supplementary Information

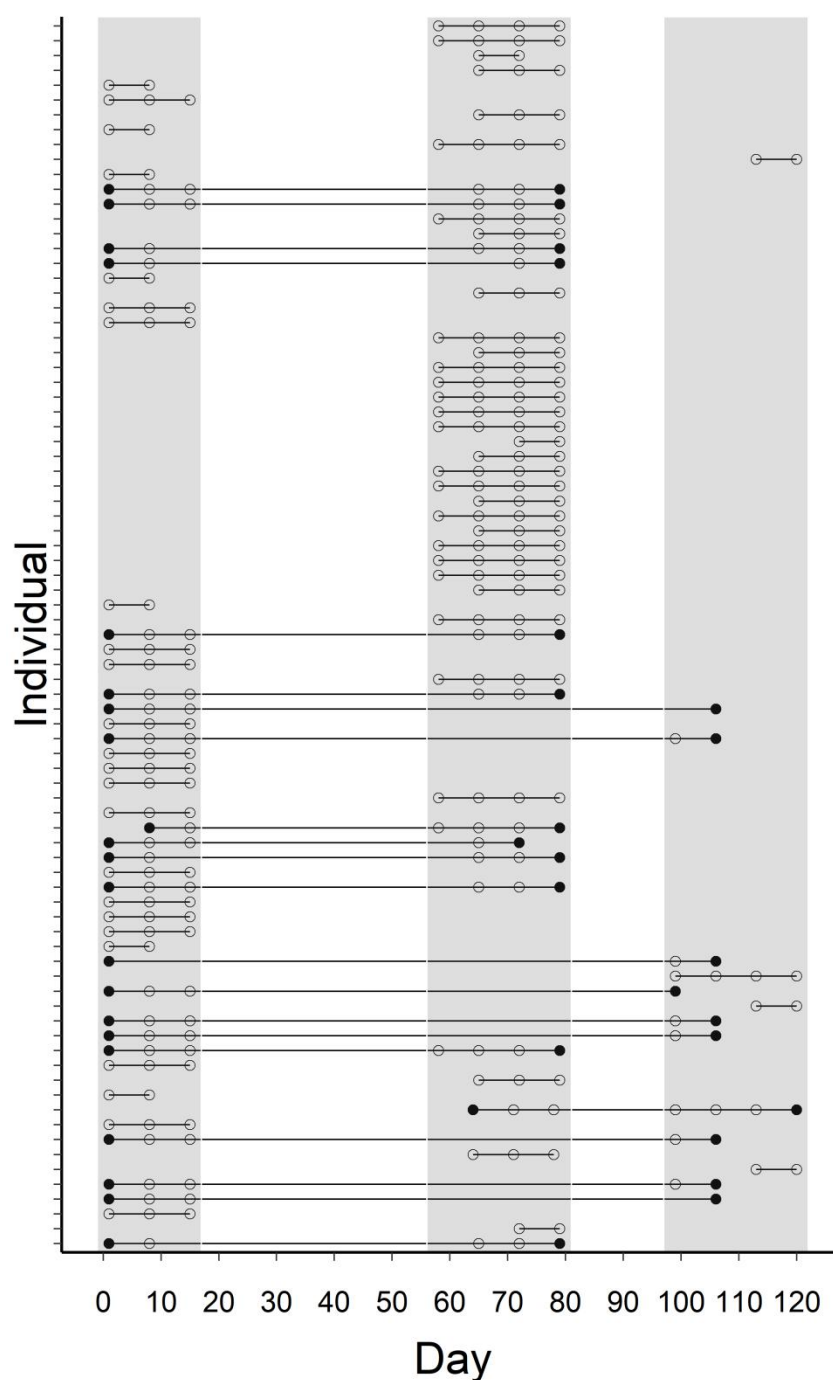

**Figure S1. Measurements used to estimate repeatability of heterothermy.** Points indicate individual measurement of body temperature during 24h fasting. Individuals are connected by lines. Filled points indicate the most distant measurements (>month) that were used to estimate the long-term repeatability. The shaded area refers to the experimental session. Day „0” indicates the 30<sup>th</sup> of December.

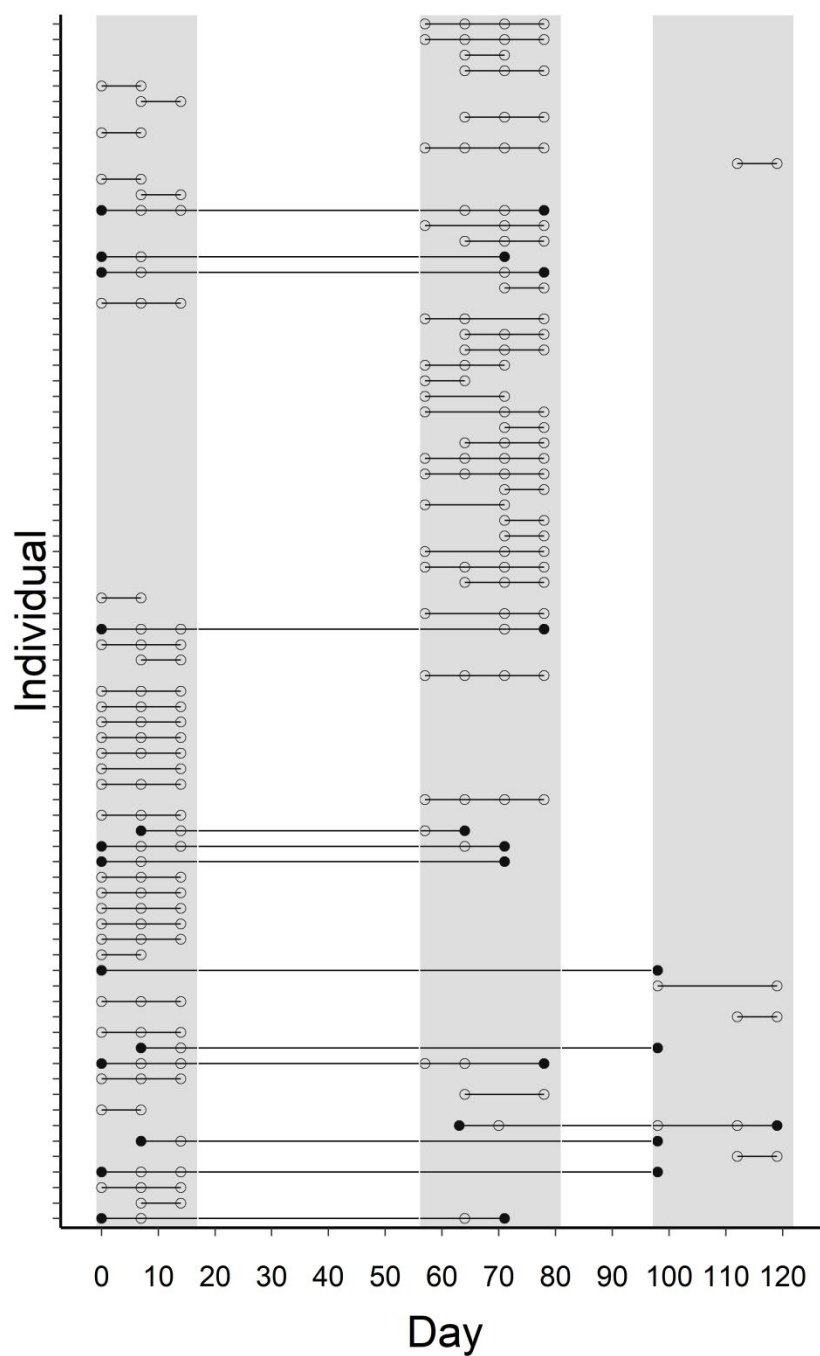

**Figure S2. Measurements used to estimate repeatability of basal metabolic rate.**

Points indicate measurements of basal metabolic rate the day before fasting.

Individuals are connected by lines. Filled points indicate the most distant measurements (>month) that were used to estimate the long-term repeatability. The shaded area refers to the experimental session. Day „0” indicates the 30yh of December.
